# Supplementary material
Source: PubMed Central journal article supplement (PMC3462004)
Supplement: NIHMS393634-supplement-1.pdf [file NIHMS393634-supplement-1.pdf]

**A**

| Drugs                |                       | MDA-MB-231        |           | MDA-MB-157        |           | MDA-MB-468        |           |
|----------------------|-----------------------|-------------------|-----------|-------------------|-----------|-------------------|-----------|
| KX-01 conc. (nmol/L) | PAX conc. in (nmol/L) | Fraction affected | CI values | Fraction affected | CI values | Fraction affected | CI values |
| 10                   | 1                     | 0.29              | 0.73      | 0.21              | 0.69      | 0.23              | 0.69      |
| 10                   | 2.5                   | 0.37              | 0.47      | 0.22              | 0.82      | 0.27              | 0.90      |
| 10                   | 5                     | 0.56              | 0.13      | 0.48              | 0.18      | 0.49              | 0.67      |
| 25                   | 1                     | 0.42              | 0.68      | 0.35              | 0.56      | 0.31              | 0.93      |
| 25                   | 2.5                   | 0.52              | 0.37      | 0.52              | 0.22      | 0.38              | 0.92      |
| 25                   | 5                     | 0.62              | 0.20      | 0.58              | 0.17      | 0.53              | 0.78      |
| 50                   | 1                     | 0.47              | 0.93      | 0.42              | 0.72      | 0.49              | 0.87      |
| 50                   | 2.5                   | 0.68              | 0.25      | 0.61              | 0.23      | 0.58              | 0.76      |
| 50                   | 5                     | 0.67              | 0.27      | 0.65              | 0.19      | 0.68              | 0.64      |

**B**

| Drugs                |                       | MDA-MB-231        |           | MDA-MB-157        |           | MDA-MB-468        |           |
|----------------------|-----------------------|-------------------|-----------|-------------------|-----------|-------------------|-----------|
| KX-01 conc. (nmol/L) | DOX conc. in (nmol/L) | Fraction affected | CI values | Fraction affected | CI values | Fraction affected | CI values |
| 10                   | 25                    | 0.24              | 1.0       | 0.19              | 0.42      | 0.23              | 0.67      |
| 10                   | 50                    | 0.30              | 0.92      | 0.25              | 0.37      | 0.25              | 0.72      |
| 10                   | 100                   | 0.44              | 0.45      | 0.49              | 0.23      | 0.26              | 0.94      |
| 10                   | 200                   | 0.45              | 0.60      | 0.50              | 0.41      | 0.29              | 1.16      |
| 25                   | 25                    | 0.43              | 0.67      | 0.19              | 0.91      | 0.32              | 0.84      |
| 25                   | 50                    | 0.42              | 0.77      | 0.24              | 0.73      | 0.34              | 0.85      |
| 25                   | 100                   | 0.49              | 0.56      | 0.19              | 1.29      | 0.35              | 0.89      |
| 25                   | 200                   | 0.55              | 0.47      | 0.27              | 1.11      | 0.40              | 0.84      |
| 50                   | 25                    | 0.35              | 2.10      | 0.27              | 0.95      | 0.27              | 2.18      |
| 50                   | 50                    | 0.37              | 2.00      | 0.18              | 1.94      | 0.27              | 2.20      |
| 50                   | 100                   | 0.41              | 1.67      | 0.19              | 2.11      | 0.25              | 2.91      |
| 50                   | 200                   | 0.41              | 1.99      | 0.19              | 2.42      | 0.27              | 2.95      |

**Supplementary Table 1**
