# Supplementary material
Source: PubMed Central journal article supplement (PMC3462004)
Supplement: NIHMS393634-supplement-5.pdf [file NIHMS393634-supplement-5.pdf]

## Tubulin immunofluorescence in MDA-MB-231 cells

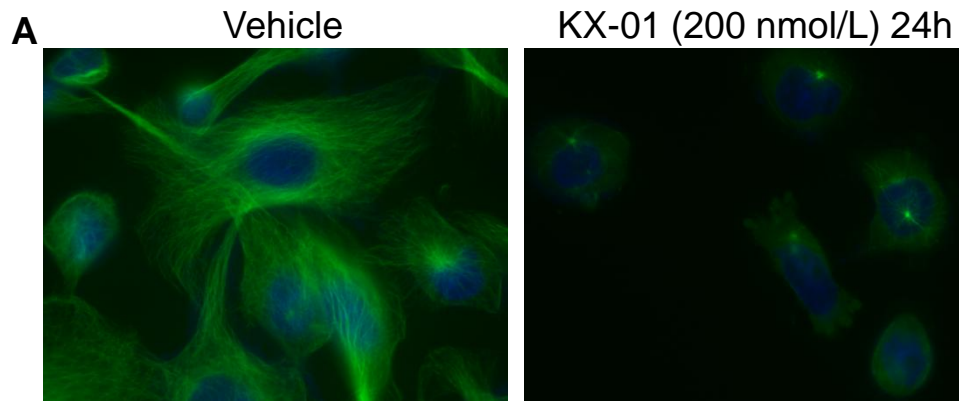

## Invasion and Migration assays in MDA-MB-231 cells

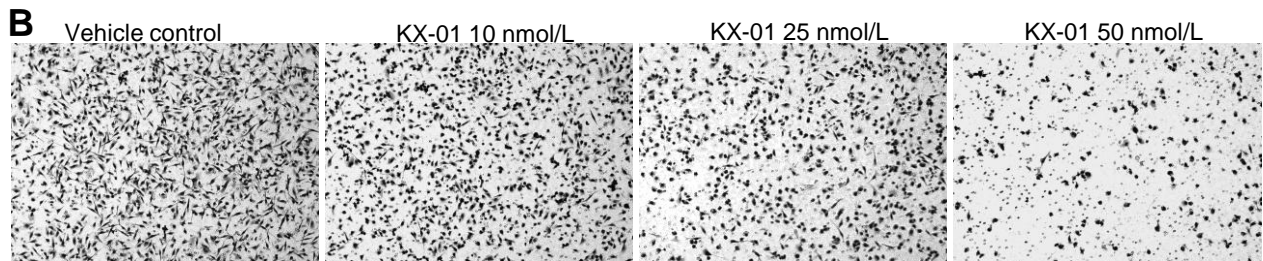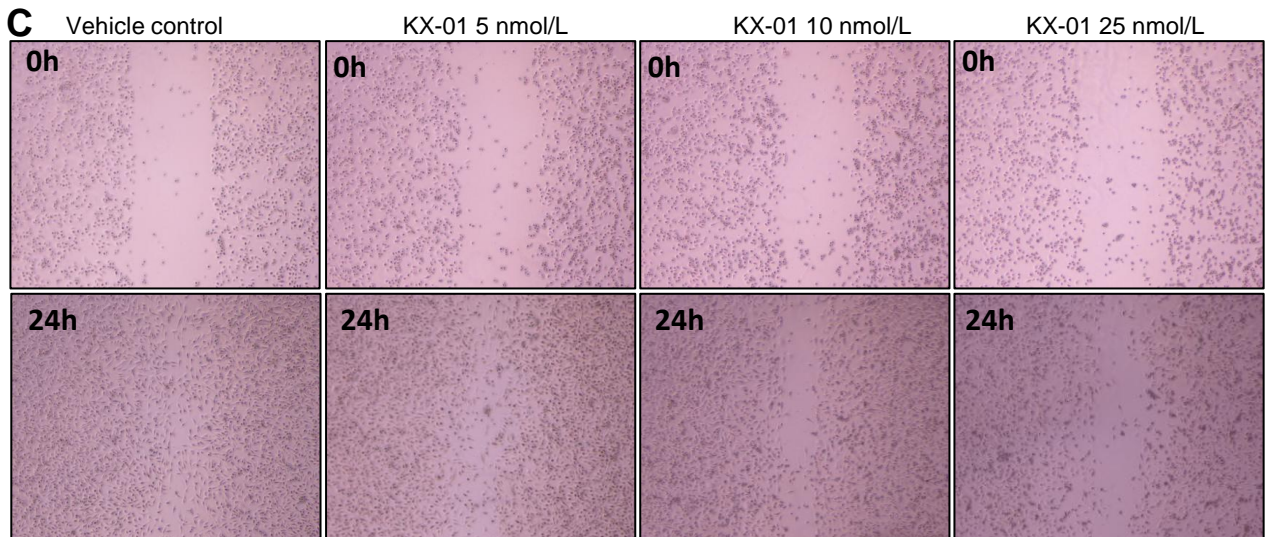

Supplementary Figure 4
