# Supplementary material
Source: PubMed Central journal article supplement (PMC3462004)

Apoptosis Assay in MDA-MB-468 cell line

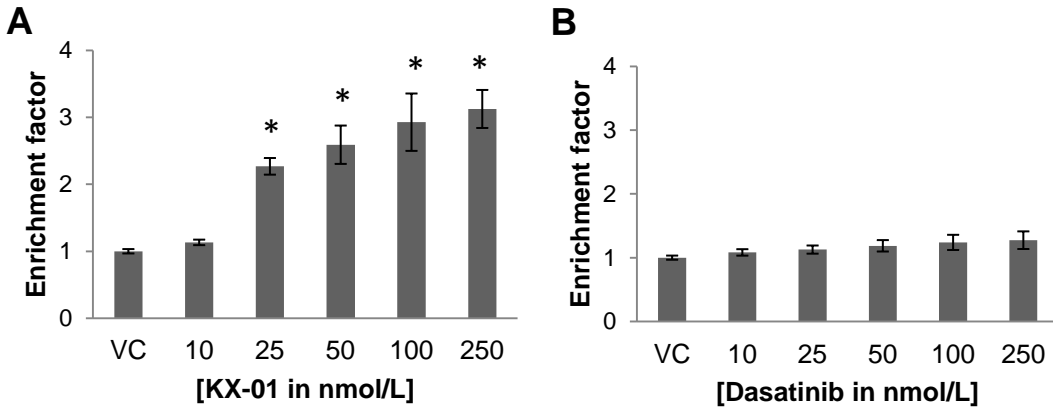

Supplementary Figure 1

Supplement: NIHMS393634-supplement-2.pdf [file NIHMS393634-supplement-2.pdf]

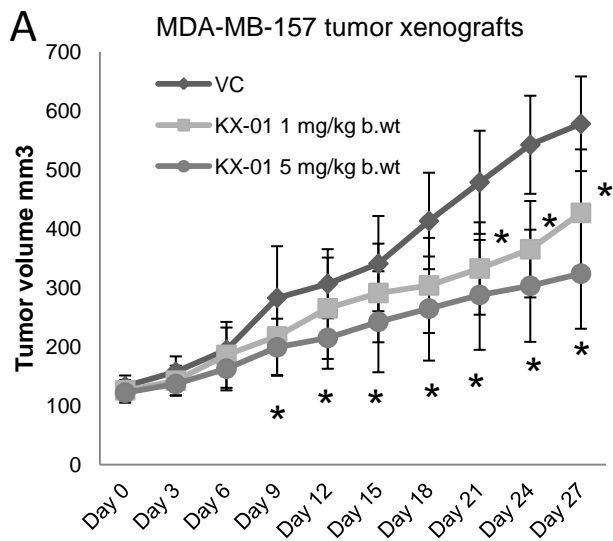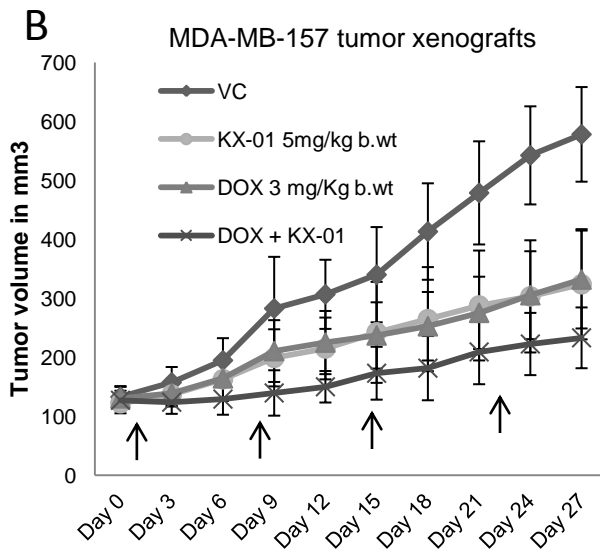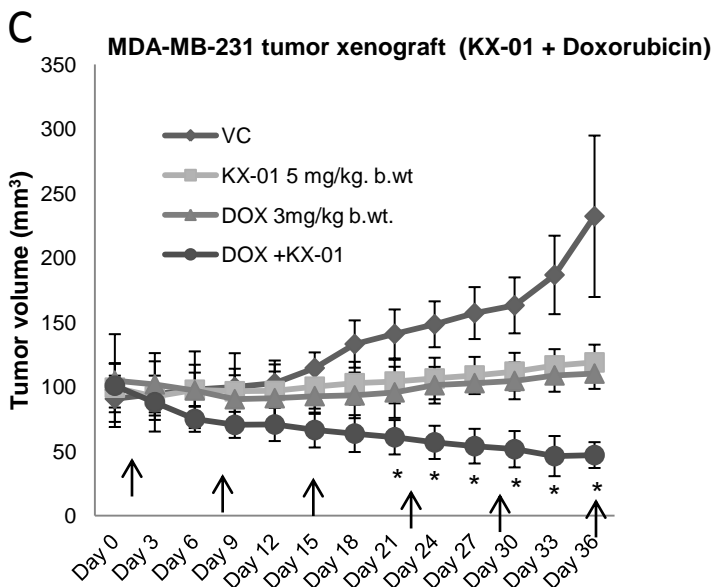

Supplementary Figure 2

Supplement: NIHMS393634-supplement-3.pdf [file NIHMS393634-supplement-3.pdf]

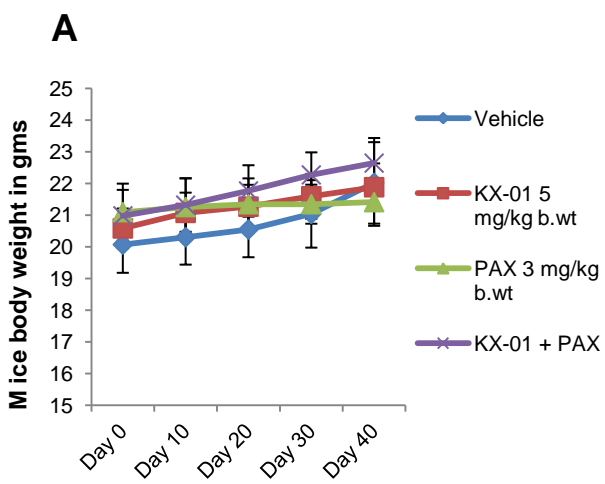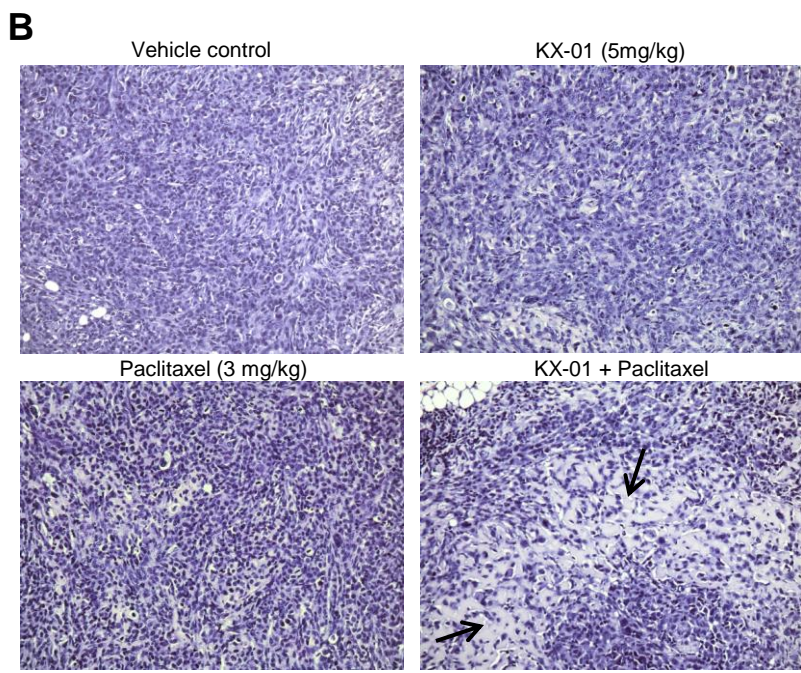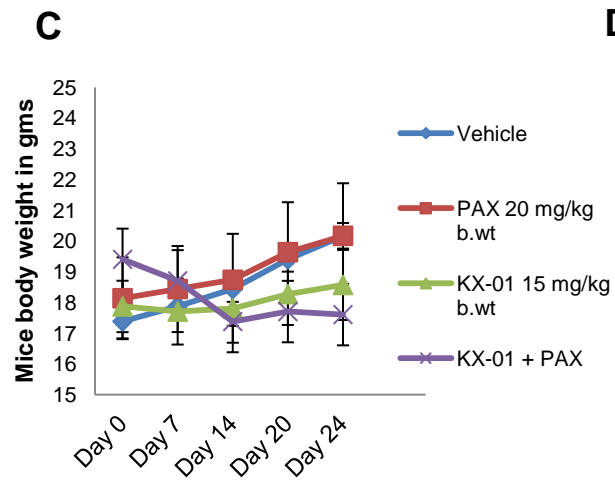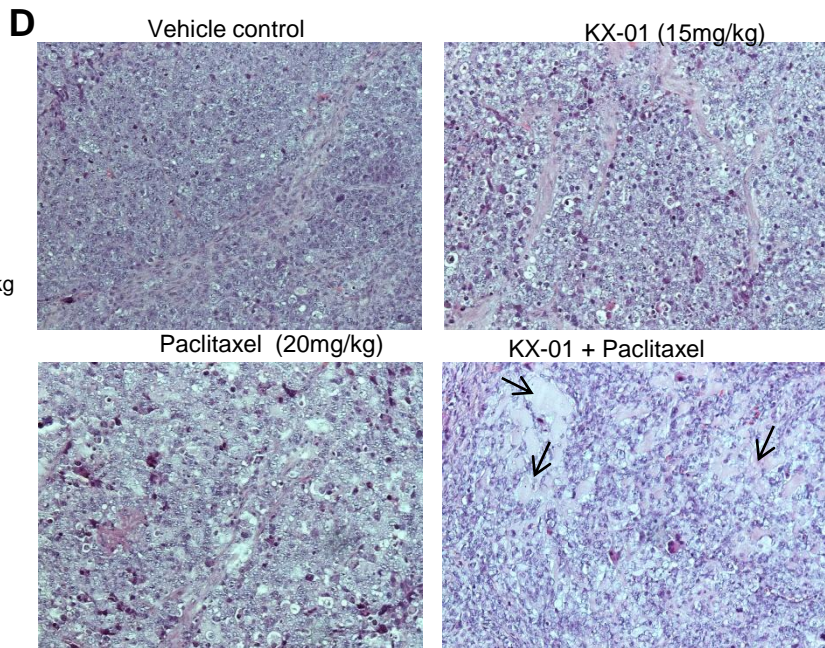

**Supplementary Figure 3**

Supplement: NIHMS393634-supplement-4.pdf [file NIHMS393634-supplement-4.pdf]

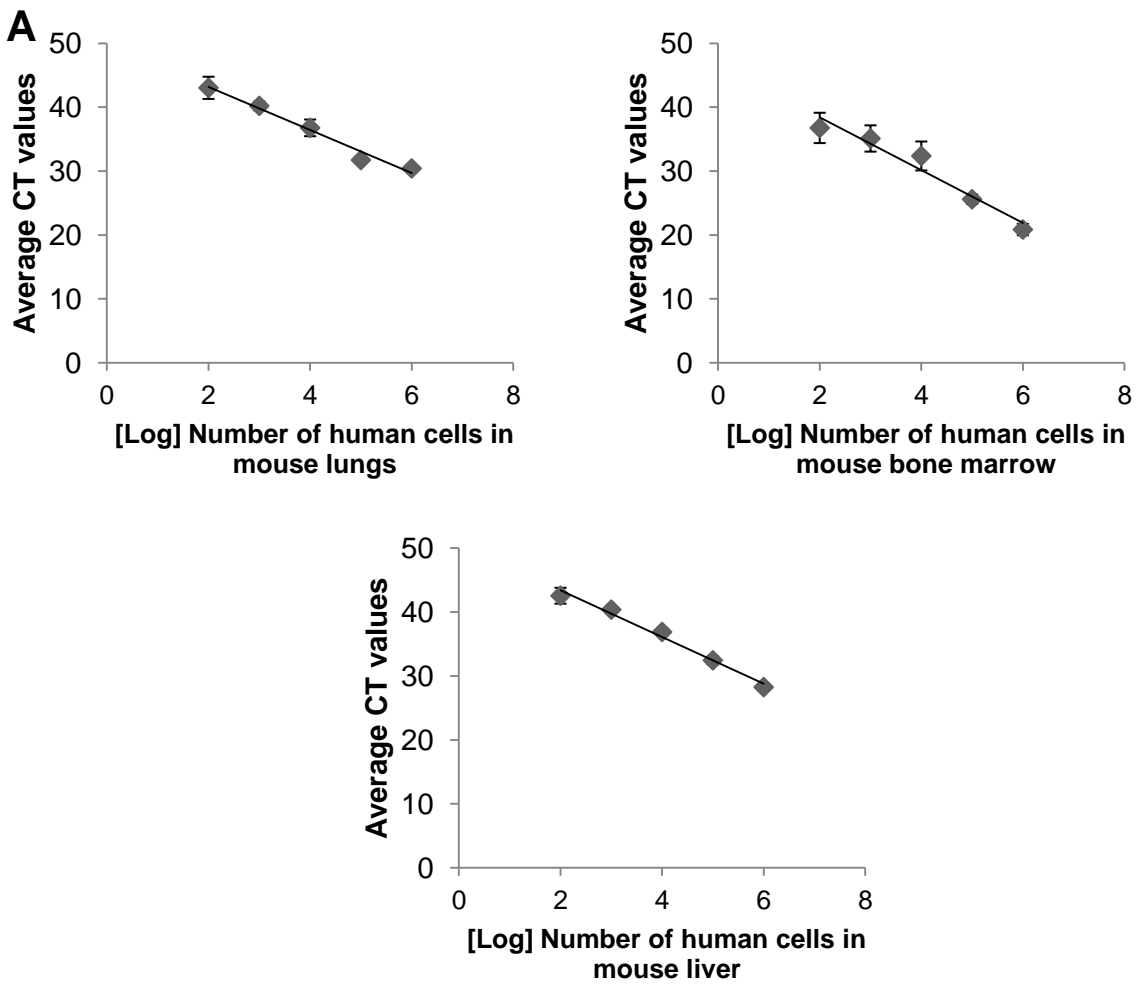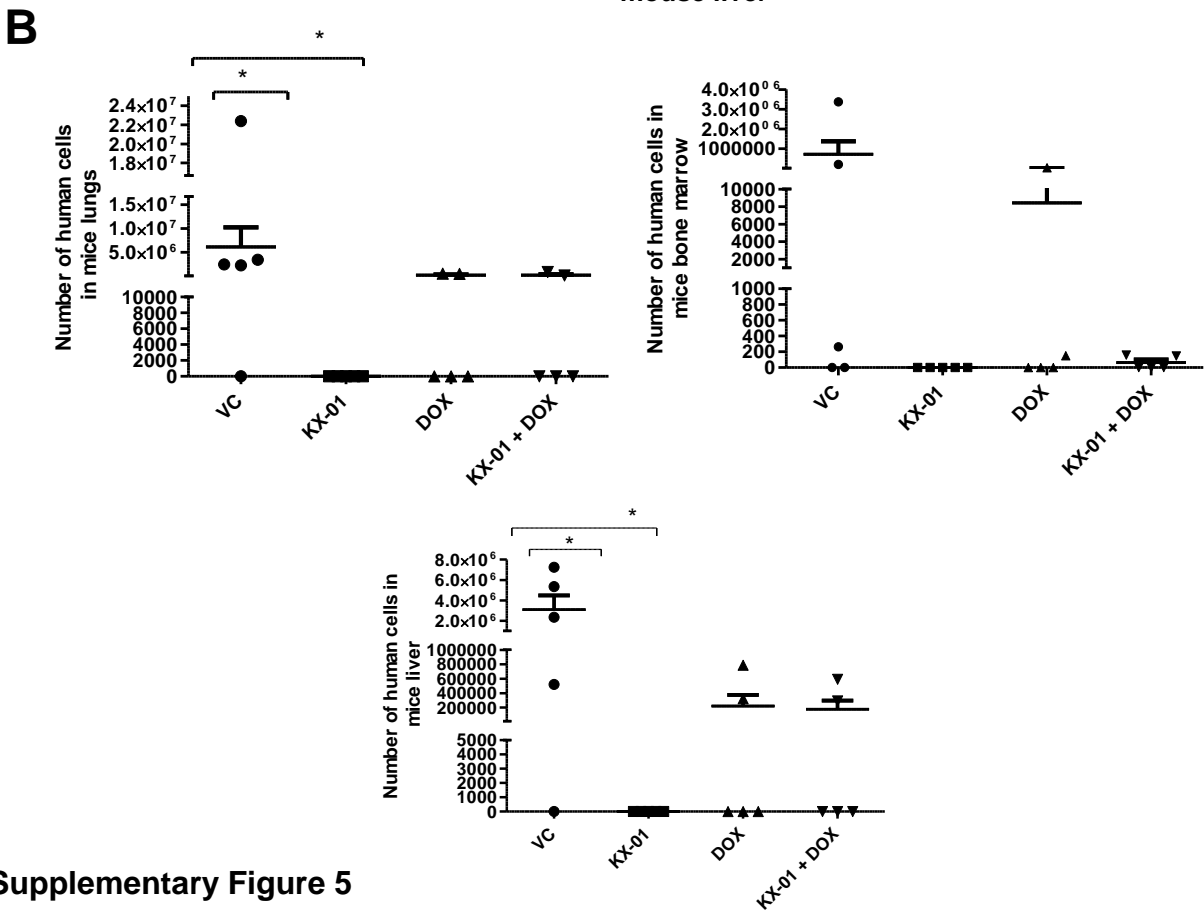

Supplementary Figure 5

Supplement: NIHMS393634-supplement-6.pdf [file NIHMS393634-supplement-6.pdf]
